# Supplementary material for: Chitosan–Gelatin Films: Plasticizers/Nanofillers Affect Chain Interactions and Material Properties in Different Ways
Source: MDPI journal article supplement (doi:10.3390/polym14183797), 2022-09-11
Supplement: s1 [file s1]

## **Supplementary Material**

# **Chitosan–Gelatin Films: Plasticizers/Nanofillers Affect Chain Interactions and Material Properties in Different Ways**

**Qingfei Duan <sup>1,†</sup>, Ying Chen <sup>2,\*,†</sup>, Long Yu <sup>1</sup> and Fengwei Xie <sup>3,\*</sup>**

<sup>1</sup> College of Food Science and Engineering, South China University of Technology, Guangzhou 510640, China

<sup>2</sup> School of Food Science and Engineering, Yangzhou University, Yangzhou 225127, China

<sup>3</sup> School of Engineering, Newcastle University, Newcastle upon Tyne, NE1 7RU, United Kingdom

\* Correspondence: 008265@yzu.edu.cn (Y.C.); david.xie@newcastle.ac.uk or fwhsieh@gmail.com (F.X.)

† These authors contributed equally to this work.

**Number of pages: 5**

**Number of figures: 6**

**Number of tables: 1**

## 1 Figures

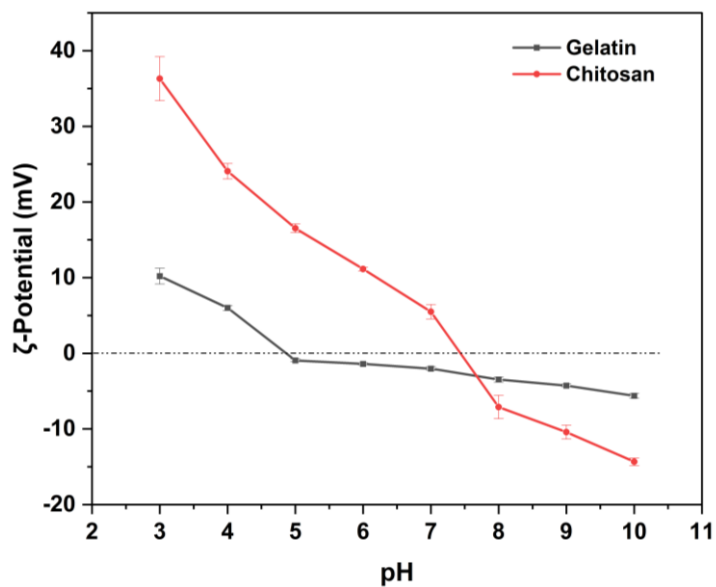

**Figure S1.**  $\zeta$ -Potential *vs.* pH curves for chitosan and gelatin.

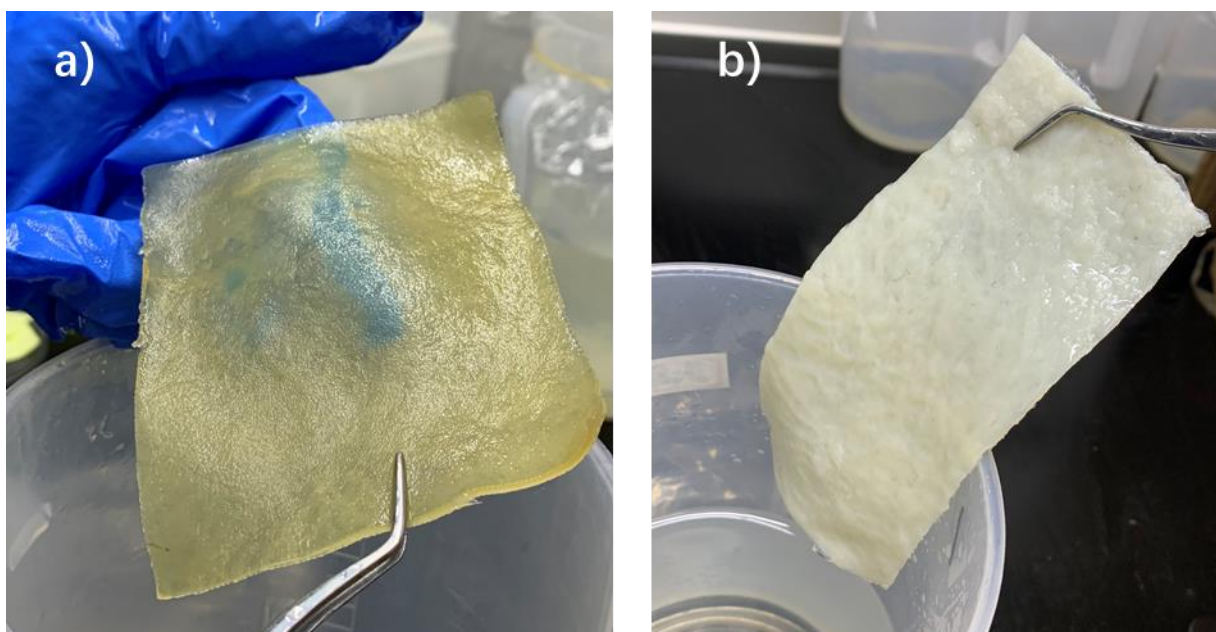

**Figure S2.** a) G-0 film after being soaked in methanol for 12 h and then in 0.1M NaOH for another 12 h; b)

G-0 film after being soaked only in 0.1M NaOH solution for 12 h.

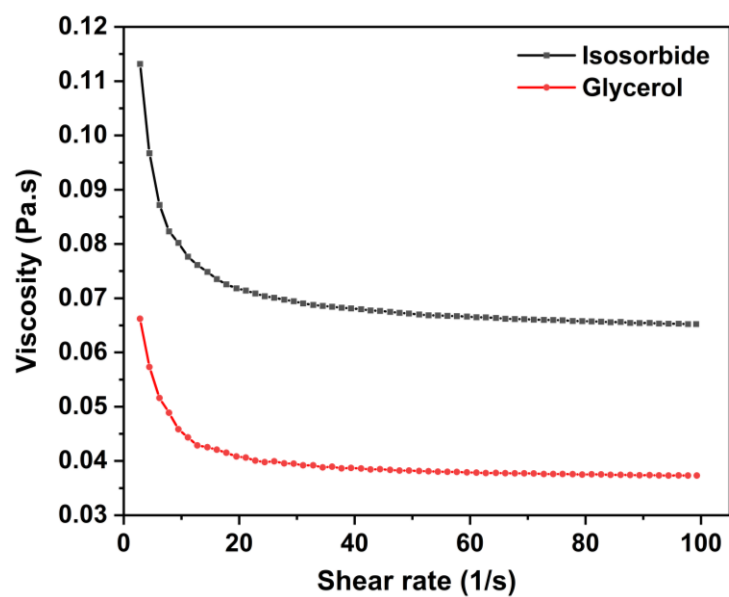

Figure S3. Viscosities of isosorbide and glycerol at 80 °C.

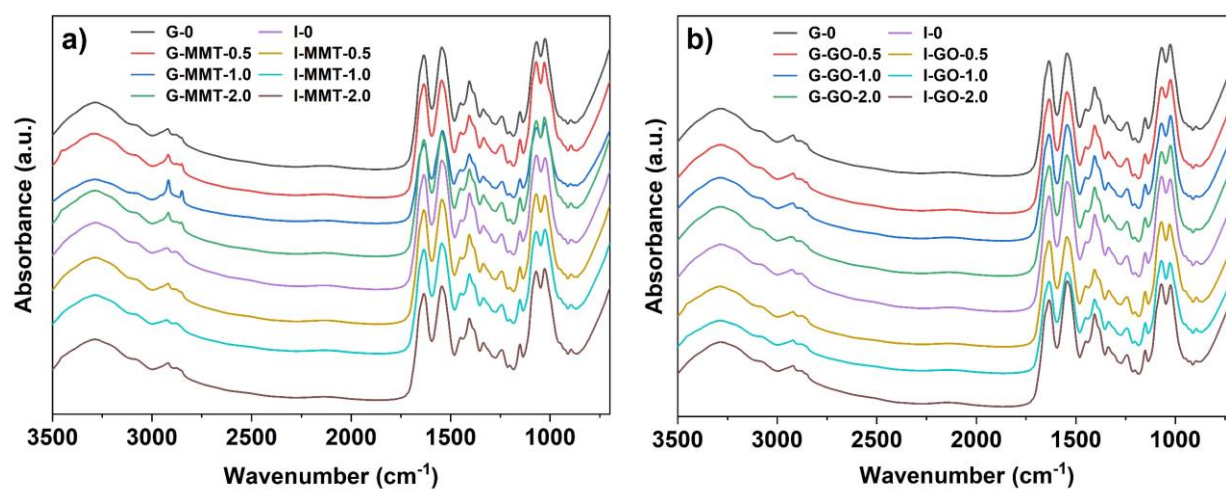

Figure S4. FTIR spectra for the different chitosan-gelatin films.

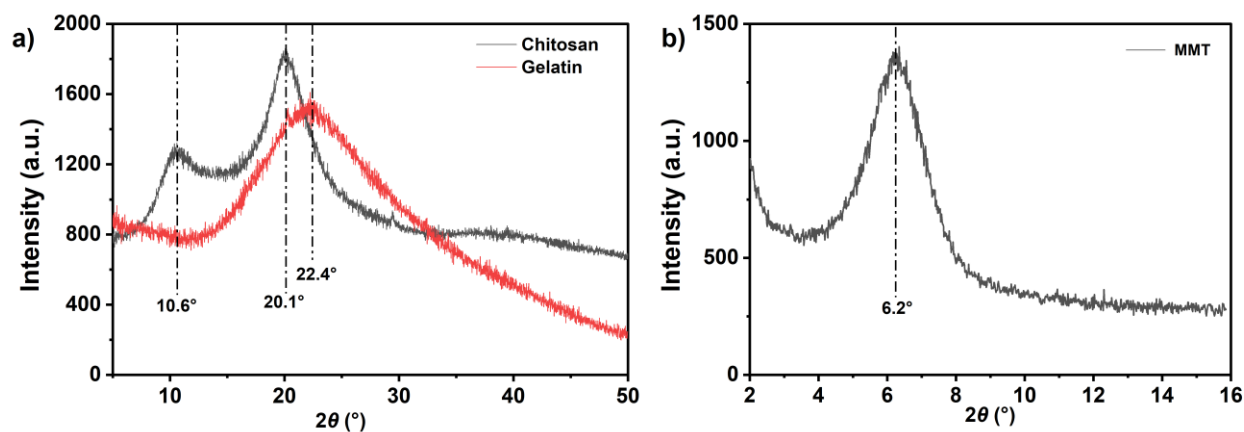

**Figure S5.** X-ray diffractogram of **a)** raw chitosan, and raw gelatin; **b)** montmorillonite (MMT) (the peak position corresponds to  $d_{001} = 1.4$  nm).

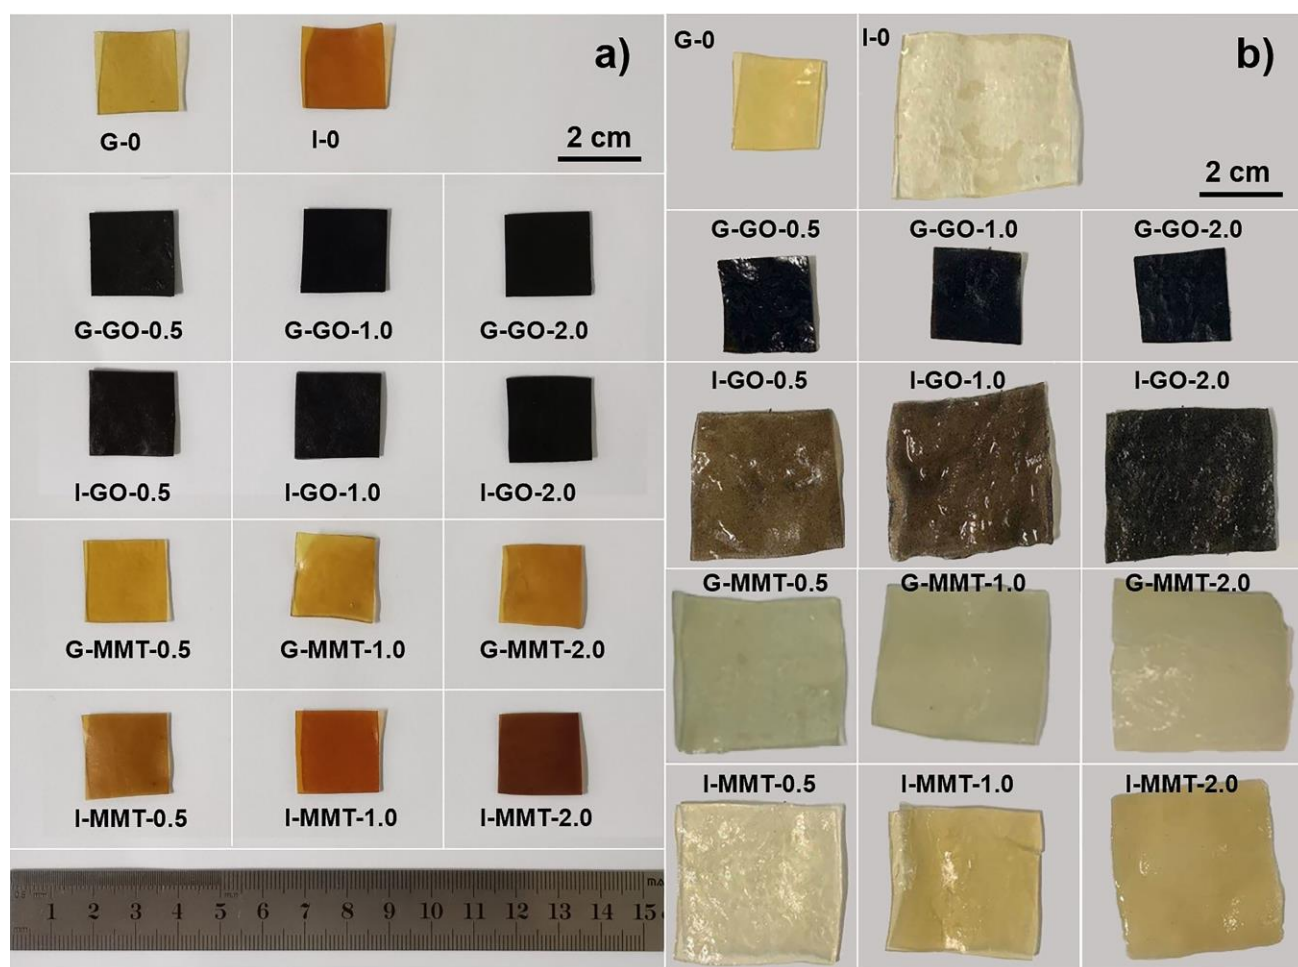

**Figure S6.** a) Photos of different biopolymer films; b) and the films after soaking in water for 24 h.

**Table S1.** Contact angle images of the different chitosan-gelatin films.

| Films     | WCA ( $^{\circ}$ , $t_0$ ) | Image                                                                               | WCA ( $^{\circ}$ , $t_{60}$ ) | Image                                                                                 |
|-----------|----------------------------|-------------------------------------------------------------------------------------|-------------------------------|---------------------------------------------------------------------------------------|
| G-0       | 92.2 $\pm$ 3.3             | 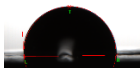   | 82.1 $\pm$ 2.3                |    |
| I-0       | 112.3 $\pm$ 0.4            |    | 88.6 $\pm$ 0.8                |    |
| G-MMT-0.5 | 112.8 $\pm$ 0.5            |    | 89.4 $\pm$ 4.9                |    |
| G-MMT-1.0 | 116.3 $\pm$ 0.2            |    | 80.6 $\pm$ 2.6                |    |
| G-MMT-2.0 | 108.1 $\pm$ 0.3            |    | 76.8 $\pm$ 0.2                |    |
| G-GO-0.5  | 95.3 $\pm$ 0.3             |    | 66.3 $\pm$ 0.9                |    |
| G-GO-1.0  | 97.4 $\pm$ 1.2             |    | 54.3 $\pm$ 1.5                |    |
| G-GO-2.0  | 89.0 $\pm$ 0.3             |   | 29.4 $\pm$ 6.8                |   |
| I-MMT-0.5 | 118.6 $\pm$ 1.5            |  | 96.0 $\pm$ 5.2                |  |
| I-MMT-1.0 | 99.3 $\pm$ 2.5             |  | 82.1 $\pm$ 8.4                |  |
| I-MMT-2.0 | 108.0 $\pm$ 6.0            |  | 95.2 $\pm$ 2.6                |  |
| I-GO-0.5  | 115.0 $\pm$ 0.5            |  | 88.6 $\pm$ 0.6                |  |
| I-GO-1.0  | 117.3 $\pm$ 1.1            |  | 92.54 $\pm$ 5.5               |  |
| I-GO-2.0  | 106.1 $\pm$ 4.6            |  | 73.3 $\pm$ 5.4                |  |
